# Supplementary material
Source: PubMed Central journal article supplement (PMC4618500)
Supplement: NIHMS719842-supplement-2.pdf [file NIHMS719842-supplement-2.pdf]

# SUPPLEMENTAL INFORMATION

## Supplemental Data

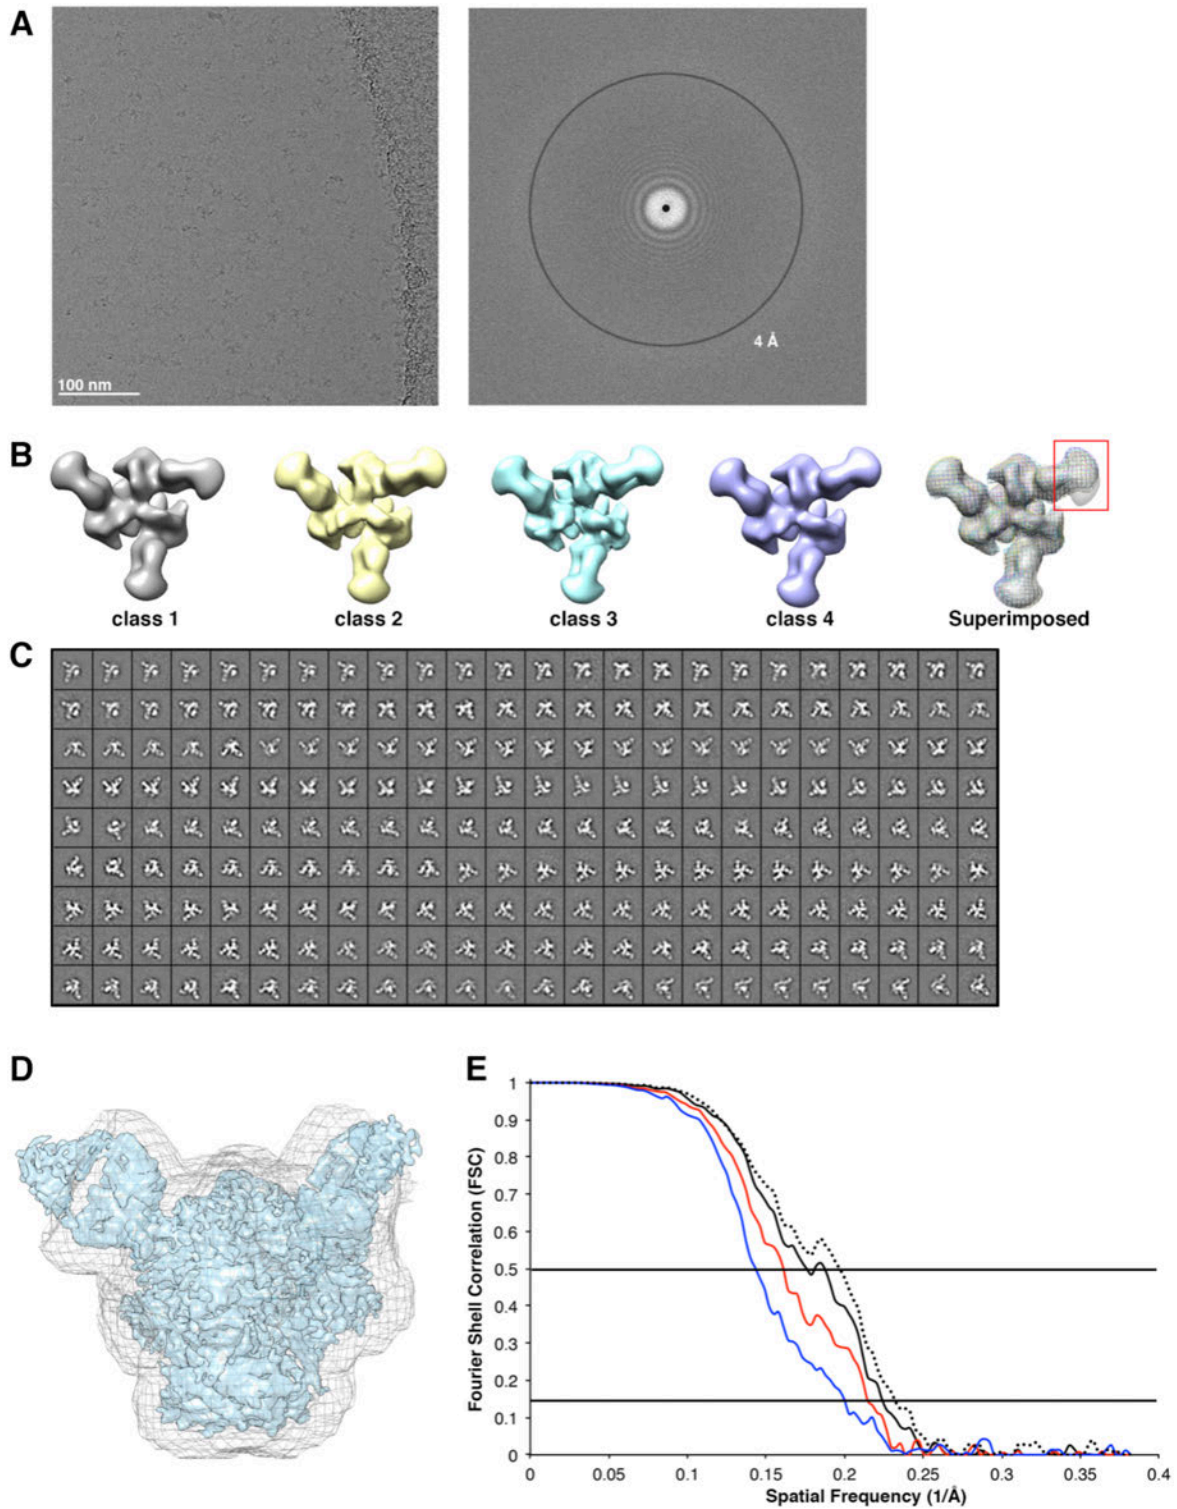

Figure S1, related to Figure 1. Data collection and refinement of BG505 SOSIP.664 trimer in complex with PGT128 Fab.

- (A) Frame-aligned micrograph (left), and its corresponding FFT (right). The image was shot at a nominal defocus of  $-2.20\ \mu\text{m}$ , with a total exposure dose of  $32.88\ \text{e}^-/\text{\AA}^2$ .
- (B) Reconstructions from the second round of 3D classification from data set 1. The classes all represent the BG505 SOSIP.664 trimer in complex with PGT128 in a near-3 fold symmetric manner. However, when the four classes are superimposed, variability in the Fab constant region can be seen. The pronounced variability in the Fab is outlined by the red box in the superimposed image of all four classes.
- (C) Reference free 2D class averages generated by an iterative topology alignment method (Ogura et al., 2003).
- (D) A mask (mesh) was applied in the final rounds of refinement to exclude the flexible Fab constant region.
- (E) Gold standard Fourier shell correlation (FSC) curves for data 1 (red), data 2 (blue), combined (black), and combined and masked (dotted line) refinements. The resolution for the final refinement (dotted line) is  $4.36\ \text{\AA}$  at  $\text{FSC}=0.143$ .

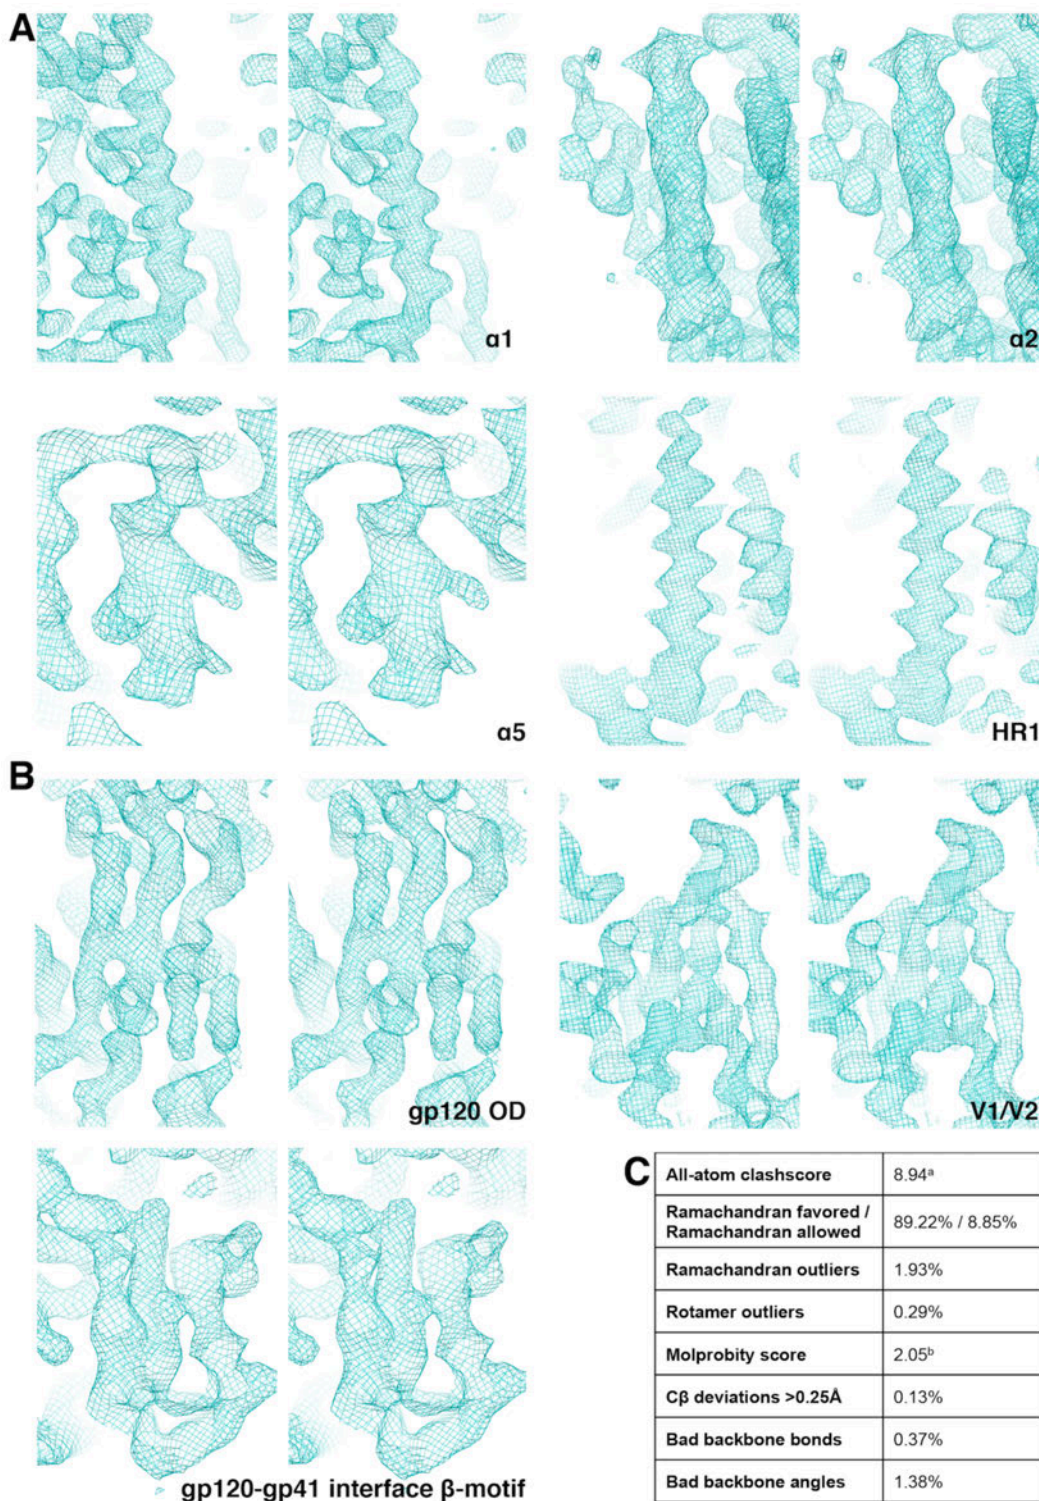

**Figure S2, related to Figure 2. Refinement of the trimer: Fab complex.**

(A) Stereo view of the  $\alpha$ -helical densities shown in Figure 2A.

(B) Stereo view of the  $\beta$ -sheet densities shown in Figure 2B.

(C) Geometric parameters for all atoms from Molprobrity after refinement. <sup>a</sup>97<sup>th</sup> percentile among structures >3 Å resolution. <sup>b</sup>100<sup>th</sup> percentile for structure between 3.25-4.61 Å resolution.

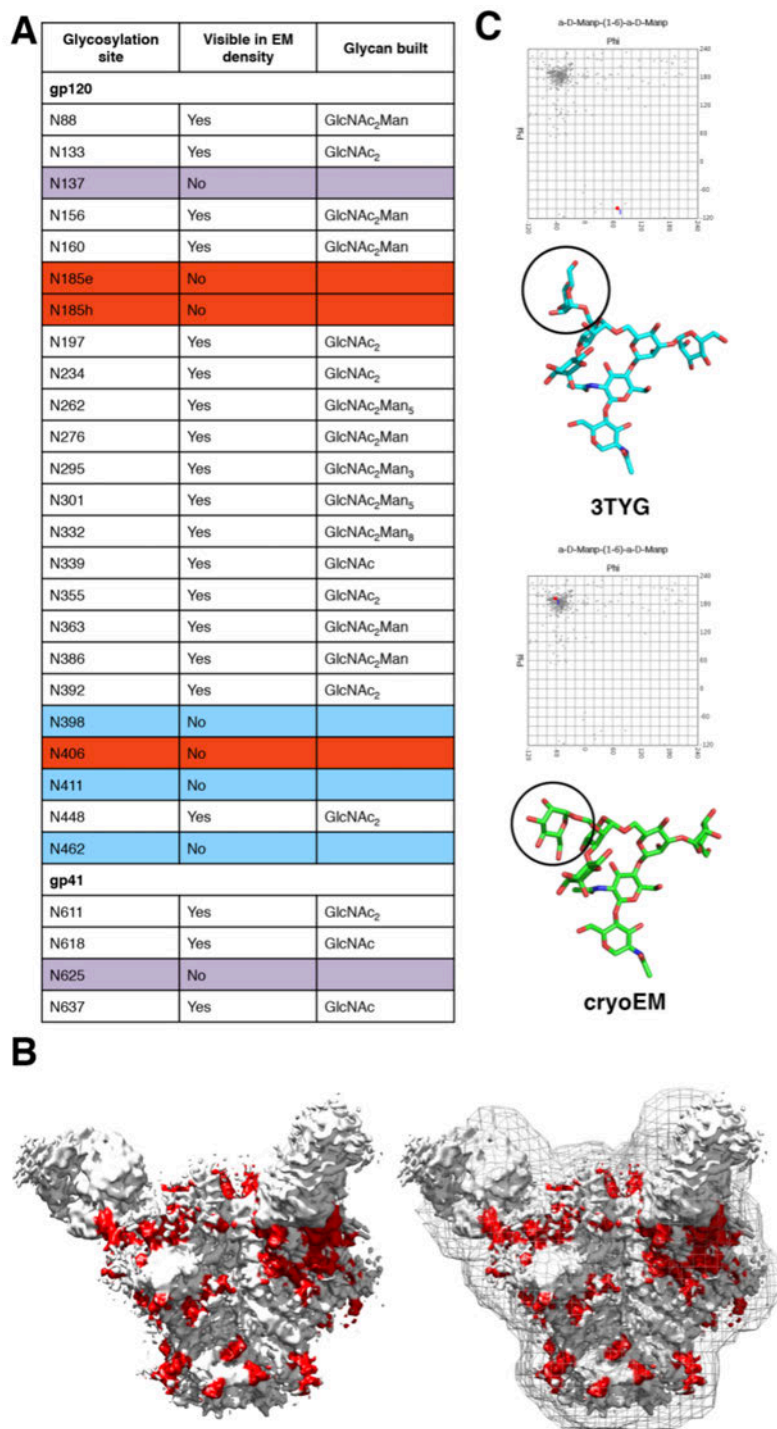

**Figure S3, related to Figure 4. Glycan density analysis.**

(A) The list of all potential glycosylation sites in BG505 SOSIP.664 and indication of whether they are visible in the EM density map. The third column indicates the glycoform built into the atomic model. Eight glycans were not built due to lack of density. The reasons for this are color-coded as follows. Red: Glycan in a region that was not built due to disorder or ambiguous density. Blue: Glycan near missing

density. Purple: Not visible due to reasons unknown, although some glycosylation sites in BG505 may not be fully occupied.

(B) Areas of the EM map corresponding to peptide (white) and ordered glycans (red) are colored differently. The map is contoured to a level where noise starts to become visible. On the left, the mask (mesh) used in the final 3 refinement iterations (Figure S1D) is superimposed onto the EM map on the right. All connected glycan densities are well within the map. Thus, the glycans that are disordered beyond the density that we can see are likely not visible due to intrinsic disorder and not due to a masking artifact.

(C) Glycan torsion analysis of the N301 D3 arm Mannose residue shows that this linkage is a severe torsion outlier (red dot) in the 3TYG structure (left). After the glycan torsion is modified to fit the EM density better, the problematic dihedral angles are resolved.

| <b>Collection Parameters</b>                          | <b>Data1</b>                         | <b>Data2</b>                         | <b>Combined</b>                     |
|-------------------------------------------------------|--------------------------------------|--------------------------------------|-------------------------------------|
| <b>Microscope</b>                                     | FEI Titan Krios                      |                                      |                                     |
| <b>Detector</b>                                       | Gatan K2 Direct Electron Detector    |                                      |                                     |
| Collection Mode                                       | Counting mode                        |                                      |                                     |
| <b>Acceleration voltage</b>                           | 300 keV                              |                                      |                                     |
| <b>Magnification</b>                                  | 22,500x                              |                                      |                                     |
| <b>Pixel Size</b>                                     | 1.31 Å/pixel                         |                                      |                                     |
| <b>Data collection duration</b>                       | 3 days                               | 18 hrs                               |                                     |
| <b>Number of Micrographs</b>                          | 1,359                                | 752                                  |                                     |
| <b>Dose</b>                                           | 32.88 e <sup>-</sup> /Å <sup>2</sup> | 35.07 e <sup>-</sup> /Å <sup>2</sup> |                                     |
| <b>Frames used</b>                                    | All                                  | All                                  |                                     |
| <b>Nominal defocus range</b>                          | 1.5-3.5 μm                           | 1.5-3.5 μm                           |                                     |
| <b>Processing Parameters</b>                          |                                      |                                      |                                     |
| <b>Particle box size</b>                              | 256x256 pixels                       | 256x256 pixels                       | 256x256 pixels                      |
| <b>Particles picked</b>                               | 181,074                              | 154,960                              |                                     |
| <b>Particles after 2D classification</b>              | 70,782                               | 62,572                               |                                     |
| <b>Particles after 3D classification</b>              | 41,173                               | 50,922                               |                                     |
| <b>Symmetry Applied</b>                               | C3                                   |                                      |                                     |
| <b>Initial low-pass filtering of reference model</b>  | 30 Å                                 |                                      |                                     |
| <b>Number of refinement iterations to convergence</b> | 25                                   | 24                                   | 22 (3) <sup>a</sup>                 |
| <b>Number of particles in final reconstruction</b>    | 41,173                               | 50,922                               | 92,095                              |
| <b>Resolution at FSC=0.143</b>                        | 4.66 Å                               | 5.01 Å                               | 4.36 <sup>b</sup>                   |
| <b>B-factor applied in sharpening</b>                 |                                      |                                      | -183.51 Å <sup>2</sup> <sup>b</sup> |

**Table S1, related to the experimental procedures of EM data collection and refinement.**

<sup>a</sup>Additional refinement iterations after applying mask to remove Fab constant region

<sup>b</sup>Values obtained for final model after mask applied refinement.

## **Supplemental References**

Ogura, T., Iwasaki, K., and Sato, C. (2003). Topology representing network enables highly accurate classification of protein images taken by cryo electron-microscope without masking. *Journal of structural biology* *143*, 185-200.
